# Supplementary material for: New Link Functions for Distribution–Specific Quantile Regression Based on Vector Generalized Linear and Additive Models
Source: Hindawi journal article supplement (doi:10.1155/2019/3493628), 2019-05-07
Supplement: f1 [file 3493628.f1.r]

# R code from "New link functions for distribution-specific
# quantile regression based on vector generalized and additive models",
# by Miranda-Soberanis and Yee,
# submitted to Journal of Probability and Statistics.
# January 2019.


# Notes:
# 1. This code runs under Linux and may need
#   edits to work on Windows or Macintosh.
# 2. Four R packages are needed below.
# (a) The latest versions of VGAM and VGAMextra are needed.
#     Details below. CRAN versions may be insufficient.
# (b) Also needed is the 'quantreg' and 'GLMsData' packages, both
#     which are available on CRAN
#     http://CRAN.R-project.org/package=quantreg
#     http://CRAN.R-project.org/package=GLMsData


options(digits = 5)


# Get VGAM running ---------------------------------------------
# If not yet installed then this gets the latest CRAN version:
# install.packages("VGAM")


library("VGAM")


# Note: minimally, these examples require VGAM version 1.1-0 or higher.
if (packageVersion("VGAM") < "1.1.0")
  warning("you need to update 'VGAM' to at least version 1.1-0")


# Note: the latest version is currently available at
# http://www.stat.auckland.ac.nz/~yee/VGAM/prerelease


# Get VGAMextra running ---------------------------------------------
# If not yet installed then this gets the latest CRAN version:
# install.packages("VGAMextra")


library("VGAMextra")


# Note: minimally, these examples require VGAMextra version 0.0-2 or higher.
if (packageVersion("VGAMextra") < "0.0.2")
  warning("you need to update 'VGAMextra' to at least version 0.0-2")


# Note: the latest version is currently available at
# http://www.stat.auckland.ac.nz/~vmir178


# Get quantreg running ---------------------------------------------
# If not yet installed then this gets the latest CRAN version:
# install.packages("quantreg")


library("quantreg")


# Get GLMsData running ---------------------------------------------
# If not yet installed then this gets the latest CRAN version:
# install.packages("GLMsData")


library("GLMsData")


# ================================================================


## ----echo=FALSE----------------------------------------------------------
# source('./setupknitrOptsYB.R')


args(vglm)


library("VGAMextra")


## ----gen-maxwell, echo=-c(1), eval=TRUE, size='small'--------------------
nn <- 200  # Must agree with 2 lines down
set.seed(1)
maxdata <- data.frame(x2 = sort(runif(n <- 200)))  # Sorted for plotting
ratefun <- function(x) exp(2 -  6 * sin(2 * x - 0.2) / (x + 0.5)^2)
# Generate the data:
maxdata <- transform(maxdata, y = rmaxwell(n, rate = ratefun(x2)))
my.tau <- c(0.25, 0.50, 0.75)  # Use these quantiles


## --------
### Quantile modelling with 'maxwellQlink()'
mydof <- 4  # Effective degrees of freedom of the smoothing spline
fit.Qmodelling <-
  vgam(Q.reg(y, pvector = my.tau) ~ s(x2, df = mydof), data = maxdata,
       maxwell(link = maxwellQlink(p = my.tau),
               type.fitted = "Qlink"))


### Quantile regression with alaplace2() from VGAM
fit.Qregression <-  vgam(y ~ s(x2, df = mydof), alaplace1(tau = my.tau,
                         llocation = "loge", parallel.locat = TRUE),
                         data = maxdata, maxit = 100)


## Figure 1 --------
#par(mfrow = c(1, 2))
par(mar = c(4, 4.0, 1.5, 2.0))
par(mfrow = c(1,1))
mylwd <- 1.5  # 1.25
mylty <- 1
with(maxdata, plot(x2, y, col = "black",
                 main = "", xlab = expression(x[2]), las = 1,
                 ylab = "y", pch = "o", cex = 0.85))
with(maxdata, matlines(x2, exp(predict(fit.Qmodelling)[, 1]), col = "blue",
                     lty = mylty, lwd = mylwd, las = 2))
with(maxdata, matlines(x2, exp(predict(fit.Qmodelling)[, 2]), col = "blue",
                     lty = mylty, lwd = mylwd, las = 2))

with(maxdata, matlines(x2, exp(predict(fit.Qmodelling)[, 3]), col = "blue",
                     lty = mylty, lwd = mylwd, las = 2))

with(maxdata, matlines(x2, fitted(fit.Qregression), col = "orange",
                     lty = 2, lwd = mylwd^2, las = 2))

legend("topleft",
       c("Quantile modelling with VGAMextra",
         "ALD Quantile regression with VGAM"),
      cex = 0.95, col = c("blue", "orange"), lty = c(mylty, 2),
      lwd = c(mylwd, mylwd^2))


## Figure 2 --------
library("quantreg")
# library("quantreg", lib.loc = "~/phdvgam/myRlibs")
qrfit25 <- rq(y ~ bs(x2), data = maxdata, tau = 0.25)
qrfit50 <- rq(y ~ bs(x2), data = maxdata, tau = 0.50)
qrfit75 <- rq(y ~ bs(x2), data = maxdata, tau = 0.75)


detach("package:quantreg")
detach("package:SparseM")


par(mar = c(4, 4.0, 1.5, 2.0))
par(mfrow = c(1,1))
mylwd <- 1.5
plot(y ~ x2, maxdata, main = "", xlab = expression(x[2]), las = 1,
     ylab = "y", cex = 0.85)
with(maxdata, matlines(x2, fitted(fit.Qmodelling), col = "blue",
                       lwd = mylwd, lty = 1))
lines(predict(qrfit25) ~ x2, maxdata, lty = 2, lwd = mylwd^2,
      col = "orange")
lines(predict(qrfit50) ~ x2, maxdata, lty = 2, lwd = mylwd^2,
      col = "orange")
lines(predict(qrfit75) ~ x2, maxdata, lty = 2, lwd = mylwd^2,
      col = "orange")
legend("topleft", lwd = c(mylwd, mylwd^2),
       c("Quantile modelling with VGAMextra",
         "Quantile regression with quantreg"),
      cex = 0.95, col = c("blue", "orange"), lty = 1:2)


# ==========================================================
## Section 3.3; Exponential Data Example -------
data(leukwbc, package = "GLMsData")
leukwbc <- transform(leukwbc, AG01 = as.factor(AG - 1),  # Creating AG01
                     logWBC = log(WBC) - 9)  # Symmetric and centred 
tauvec <- c(25, 75) / 100  # Quantiles of interest
expfit1 <- vglm(Q.reg(Time, tauvec) ~ logWBC + AG01, data = leukwbc,
                exponential(expQlink(p = tauvec), ishrink = 0.05))
coef(expfit1, matrix = TRUE)


## ----echo=FALSE
my.coef <- coef(expfit1, matrix = TRUE)
exp.my.coef <- exp(my.coef)


## ----
# Fit a gamma model
gamma1fit <- vglm(Q.reg(Time, tauvec) ~ logWBC + AG01, data = leukwbc,
                  gamma1(gamma1Qlink(p = tauvec),
                         parallel = FALSE ~ AG01))
coef(gamma1fit, matrix = TRUE)

## ---------
my.coef <- coef(gamma1fit, matrix = TRUE)
exp.my.coef <- exp(my.coef)

## ---------
constraints(gamma1fit, matrix = TRUE)


detach("package:GLMsData")


# ==========================================================
